# Supplementary material
Source: publisher figshare collection journal article supplement (https://tandf.figshare.com/articles/dataset/_/6015404)

Comparison of restituted parameters using Eikonal method with different integration approaches compared to the Snell Descartes method as reference in function of the integration step

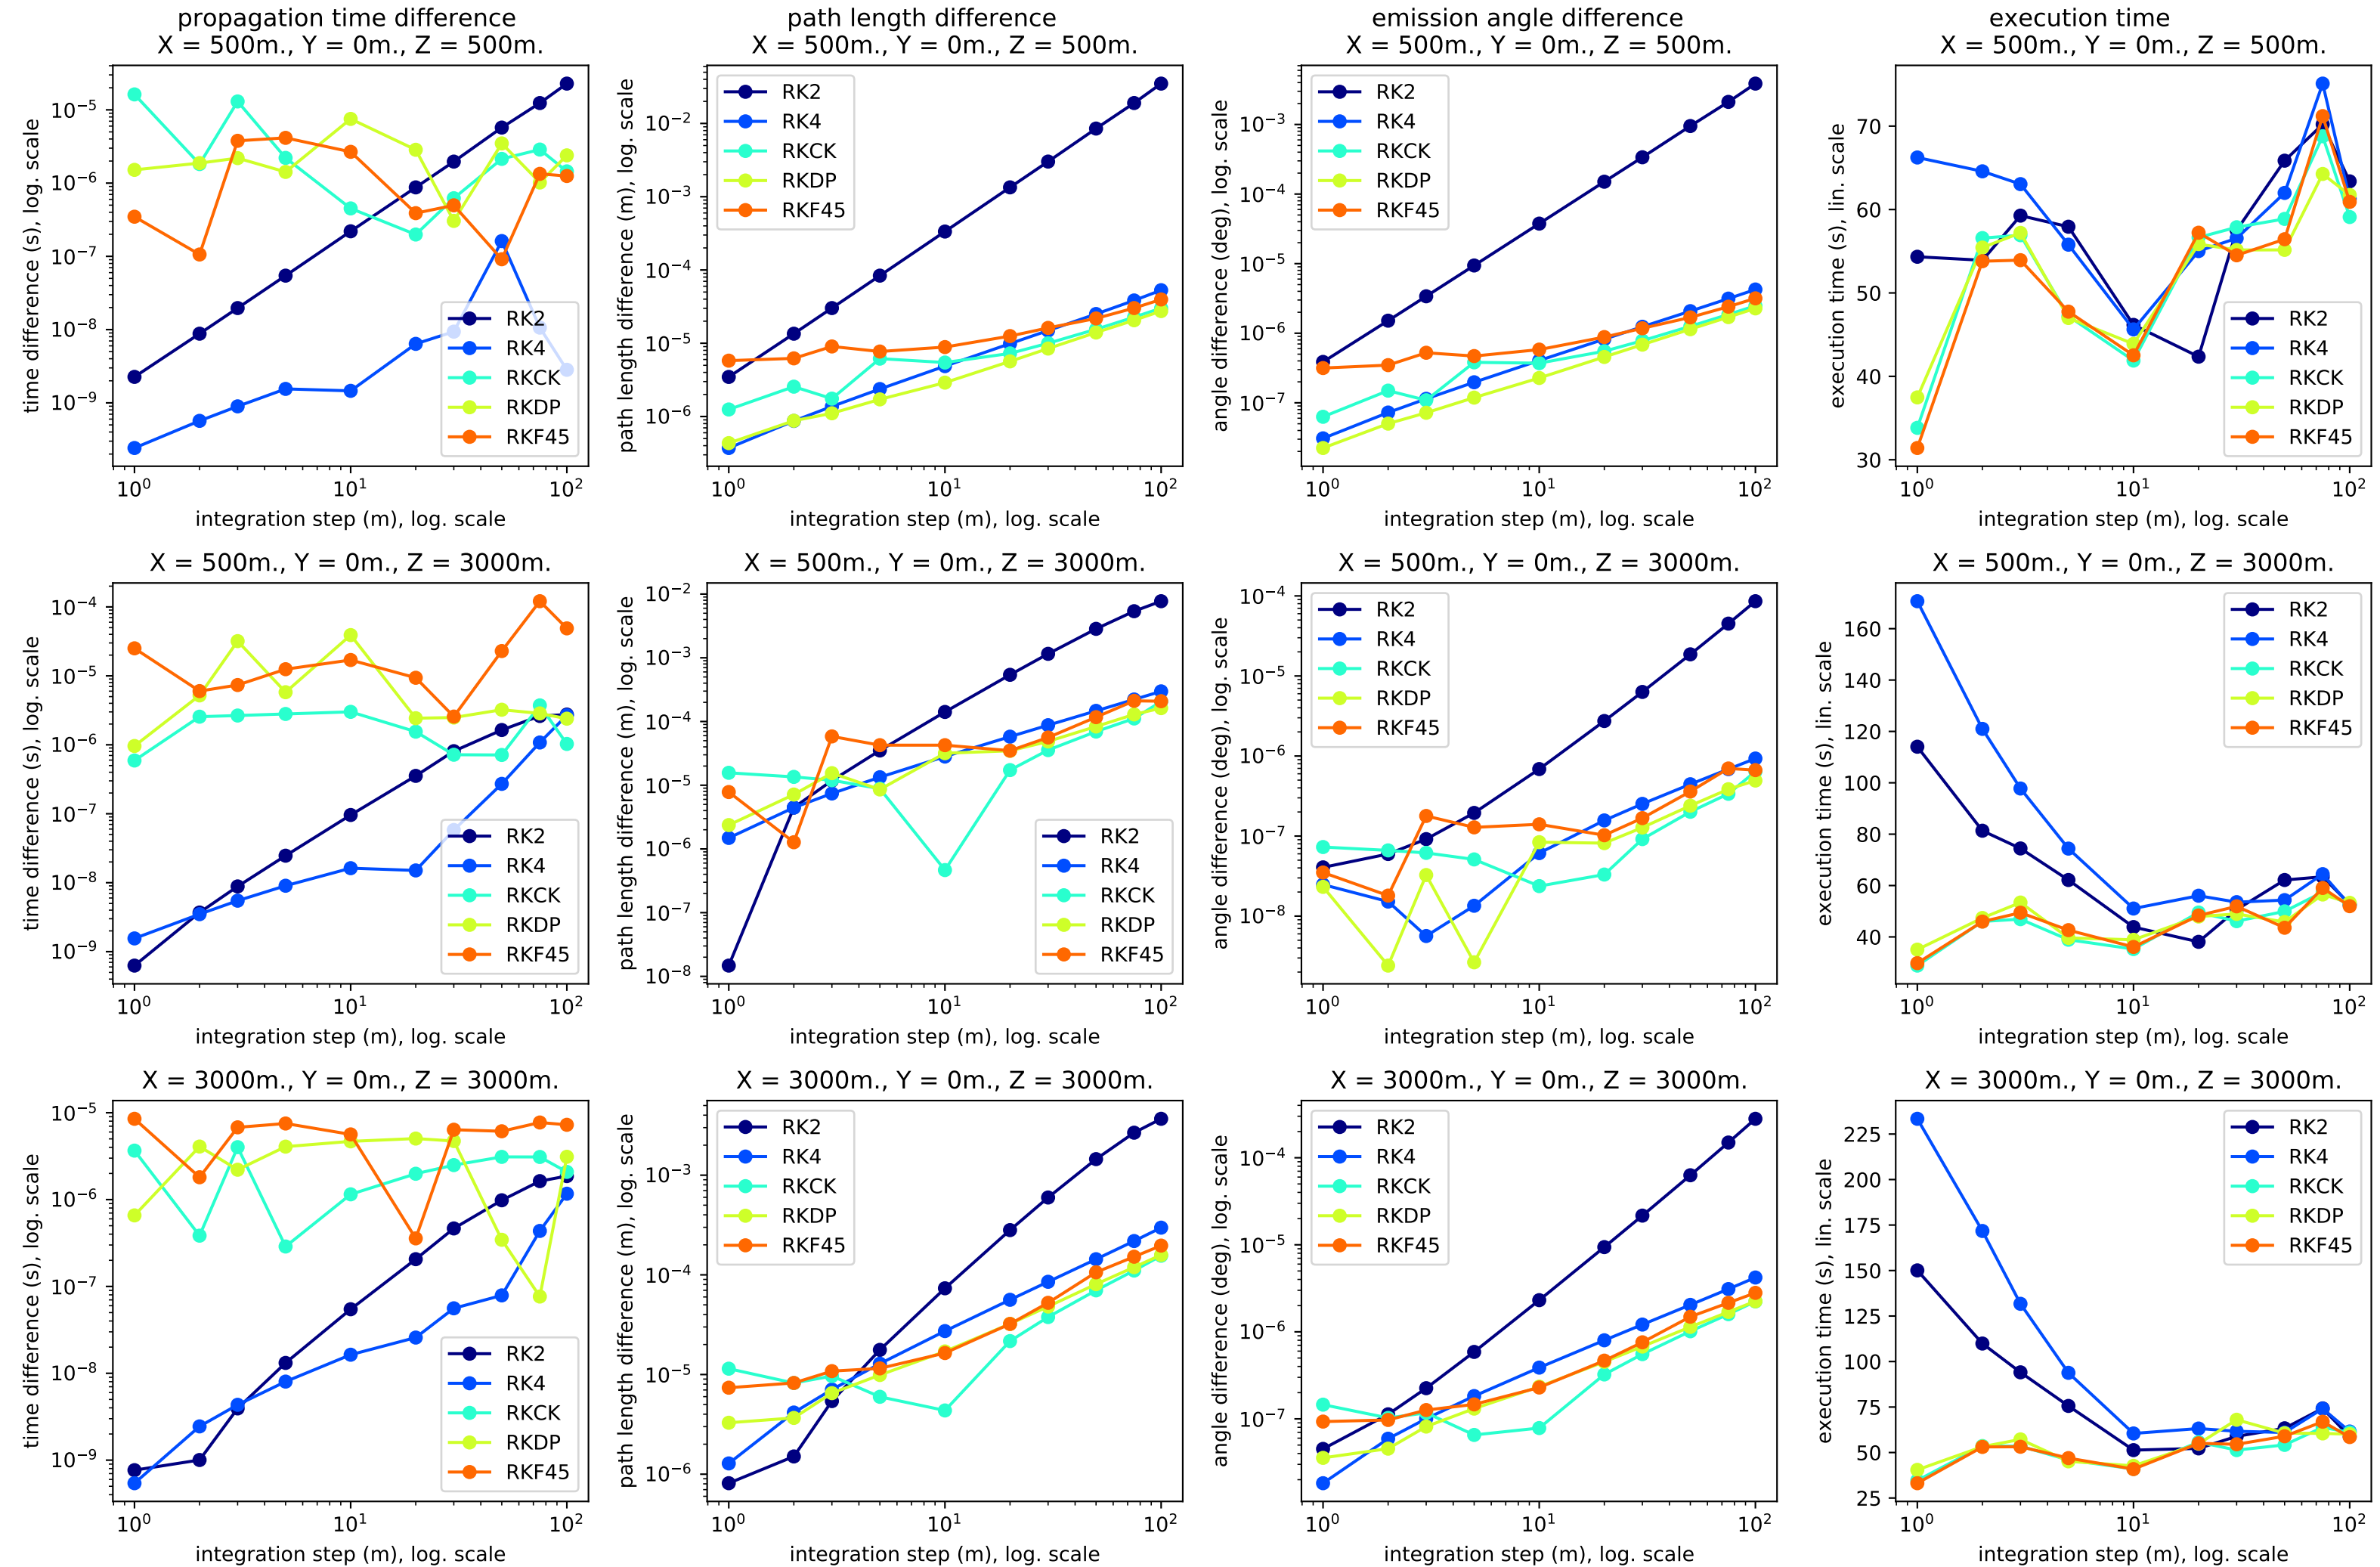

Supplement: Supplementary file 3 [file 1]
